# Supplementary material for: Cobalt vacancies assisted ion diffusion in Co2AlO4 carbon nanofibers for enhancing lithium battery performance
Source: Royal Society of Chemistry journal article supplement (doi:10.1039/d0dt01842b), 2020-01-01
Supplement: d0dt01842b1.pdf [file d0dt01842b1.pdf]

## Supplementary information

### **Cobalt Vacancies Assisted Ions Diffusion in Co<sub>2</sub>AlO<sub>4</sub>/Carbon Nanofibers for Enhancing Lithium Battery Performance**

*Qian Shi, Yin Zhang, Kaiyun Chen, Shuang Yuan, Fanghua Tian, Tieyan Chang, Yangqin Cheng, Kangkang Yao, Sen Yang\* and Xuan Zhou\**

**SEM and TEM images of Co<sub>2</sub>AlO<sub>4</sub>/C NFs and Co<sub>2</sub>AlO<sub>4</sub> NFs:** By observing the SEM images of Co<sub>2</sub>AlO<sub>4</sub>/C NFs and Co<sub>2</sub>AlO<sub>4</sub> NFs through Fig. S1a and Fig. S1b, they are all continuous nanofibers with different diameters. Many Co<sub>2</sub>AlO<sub>4</sub> nanoparticles embedded in carbon nanofibers were observed by the TEM image in Fig. S1c. The HRTEM image shows the excellent graphitization of carbon nanofibers with an interplanar spacing of 0.33 nm corresponding to (002) surface and the nanoparticles are encased in graphite with interplanar spacing of 0.28 nm and 0.24 nm corresponding (220) and (311) surface of Co<sub>2</sub>AlO<sub>4</sub> in Fig. S1e. Nanofibers are composed of Co<sub>2</sub>AlO<sub>4</sub> nanoparticles shown in Fig. S1d. The HRTEM image shows regular crystal faces of 0.47nm and 0.28nm correspond to (111) and (220) surface of Co<sub>2</sub>AlO<sub>4</sub> in Fig. S1f.

**Composition ratio in Co<sub>2</sub>AlO<sub>4</sub>/C NFs @ Co<sub>2</sub>AlO<sub>4</sub> NS and Co<sub>2</sub>AlO<sub>4</sub>/C NFs respectively:** To clearly investigate the degree of graphitization and the thermal behavior of carbon in Co<sub>2</sub>AlO<sub>4</sub>/C NFs @ Co<sub>2</sub>AlO<sub>4</sub> NS. The Raman spectrum of the material is shown in the Fig. S2a. The spectrum of Co<sub>2</sub>AlO<sub>4</sub>/C NFs @ Co<sub>2</sub>AlO<sub>4</sub> NS composites clearly exhibited a pair of peaks at 1323.8 and 1597.5 cm<sup>-1</sup>, corresponding to a defect or disorder evoked D band and a crystalline G band of graphitic materials, respectively. The large intensity of D band implied that there are numerous sp<sup>3</sup> structures in the carbon nanofibers, which were probably introduced during calcinations. These amorphous carbons should partially decompose less than 300°C, which has been reported in previous works<sup>1-2</sup>. The proportion of carbon and Co<sub>2</sub>AlO<sub>4</sub> in Co<sub>2</sub>AlO<sub>4</sub>/C NFs

@  $\text{Co}_2\text{AlO}_4$  NS and  $\text{Co}_2\text{AlO}_4/\text{C}$  NFs can be understood in Fig. S2b, which ~30% carbon and ~70%  $\text{Co}_2\text{AlO}_4$  are in  $\text{Co}_2\text{AlO}_4/\text{C}$  NFs @  $\text{Co}_2\text{AlO}_4$  NS and ~34% carbon and ~66%  $\text{Co}_2\text{AlO}_4$  are in  $\text{Co}_2\text{AlO}_4/\text{C}$  NFs.

**Rate performance of  $\text{Co}_2\text{AlO}_4/\text{C}$  NFs:** The  $\text{Co}_2\text{AlO}_4/\text{C}$  NFs electrode shows poor cyclic stability at a current density of  $100\text{mA g}^{-1}$ . The specific discharge capacity of  $\text{Co}_2\text{AlO}_4/\text{C}$  NFs only remains at  $482.3\text{ mAh g}^{-1}$  after 10 cycles. The rate performance of the  $\text{Co}_2\text{AlO}_4/\text{C}$  NFs electrode is much lower than  $\text{Co}_2\text{AlO}_4/\text{C}$  NFs @  $\text{Co}_2\text{AlO}_4$  NS electrode.

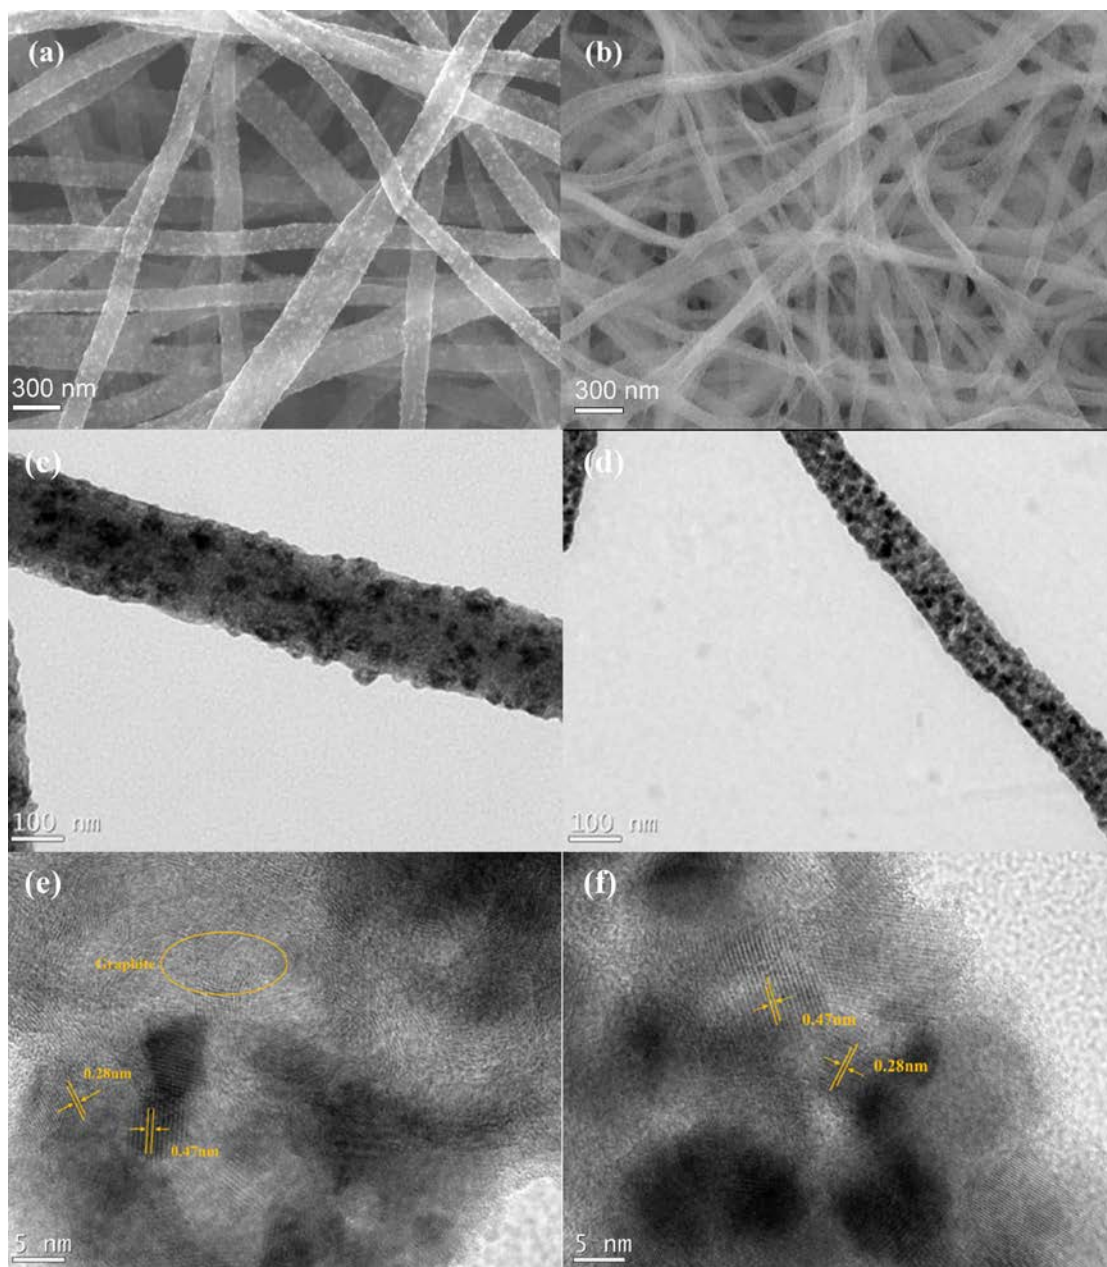

Fig. S1. SEM images of (a) Co<sub>2</sub>AlO<sub>4</sub>/C NFs and (b) Co<sub>2</sub>AlO<sub>4</sub> NFs, TEM images of (c)Co<sub>2</sub>AlO<sub>4</sub>/C NFs and (d) Co<sub>2</sub>AlO<sub>4</sub> NFs, HRTEM images of (e) Co<sub>2</sub>AlO<sub>4</sub>/C NFs and (f)Co<sub>2</sub>AlO<sub>4</sub> NFs

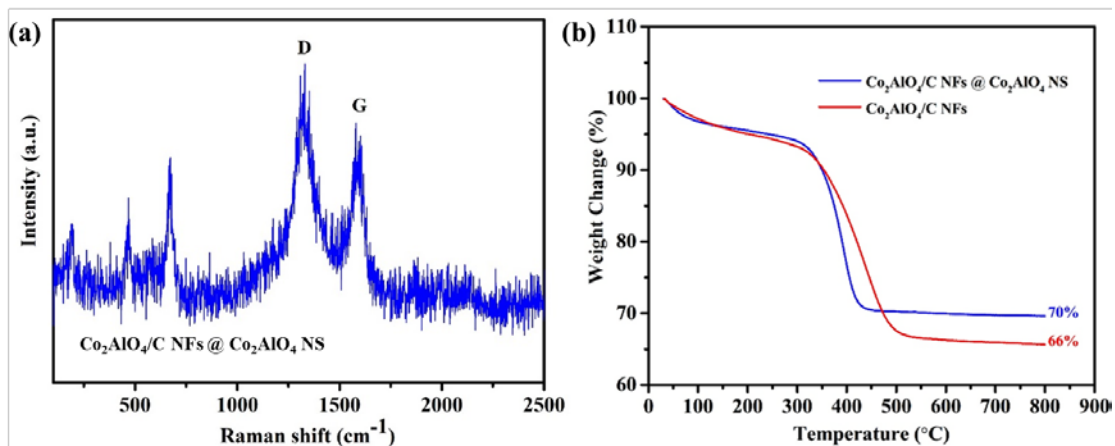

Fig. S2. (a) Raman spectrum of  $\text{Co}_2\text{AlO}_4/\text{C NFs} @ \text{Co}_2\text{AlO}_4 \text{ NS}$ , (a) TGA curves of different samples.

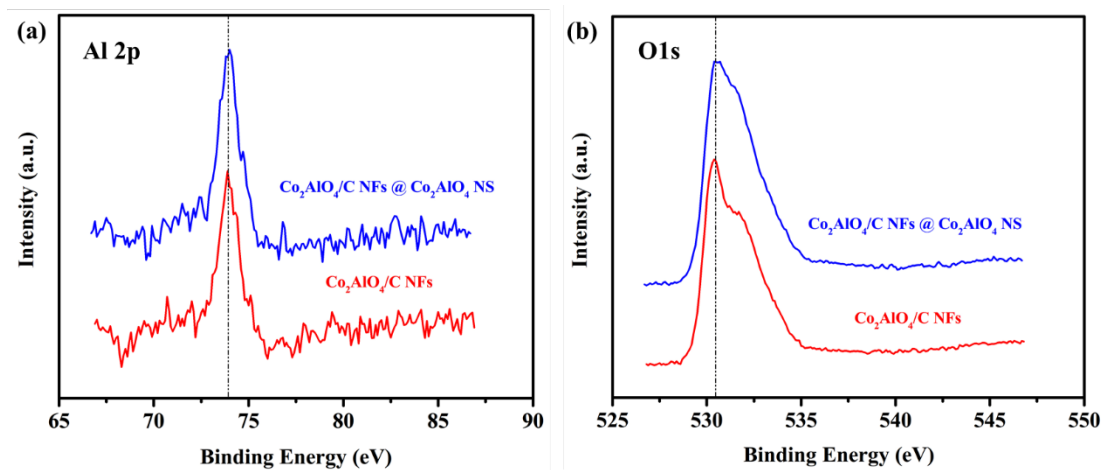

Fig. S3. High resolution XPS spectra of the (a) O1s, (b) Al 2p of  $\text{Co}_2\text{AlO}_4/\text{C NFs} @ \text{Co}_2\text{AlO}_4 \text{ NS}$  and  $\text{Co}_2\text{AlO}_4/\text{C NFs}$ .

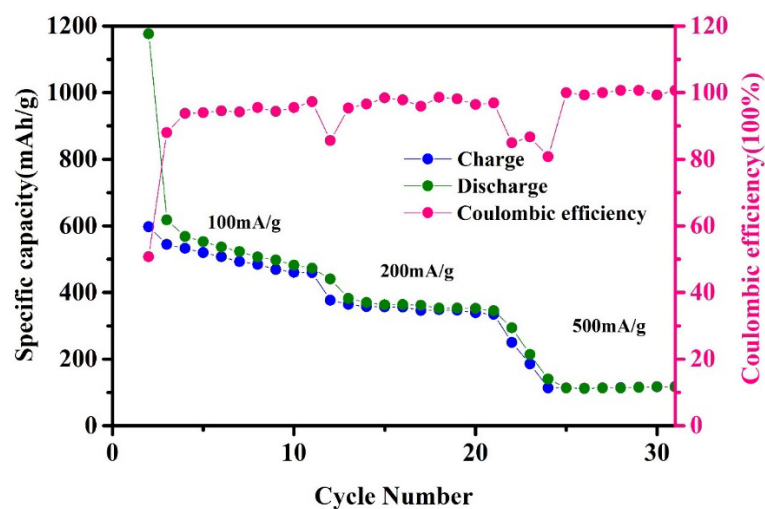

Fig. S4. Rate performance of  $\text{Co}_2\text{AlO}_4/\text{C NFs}$  at various current density.

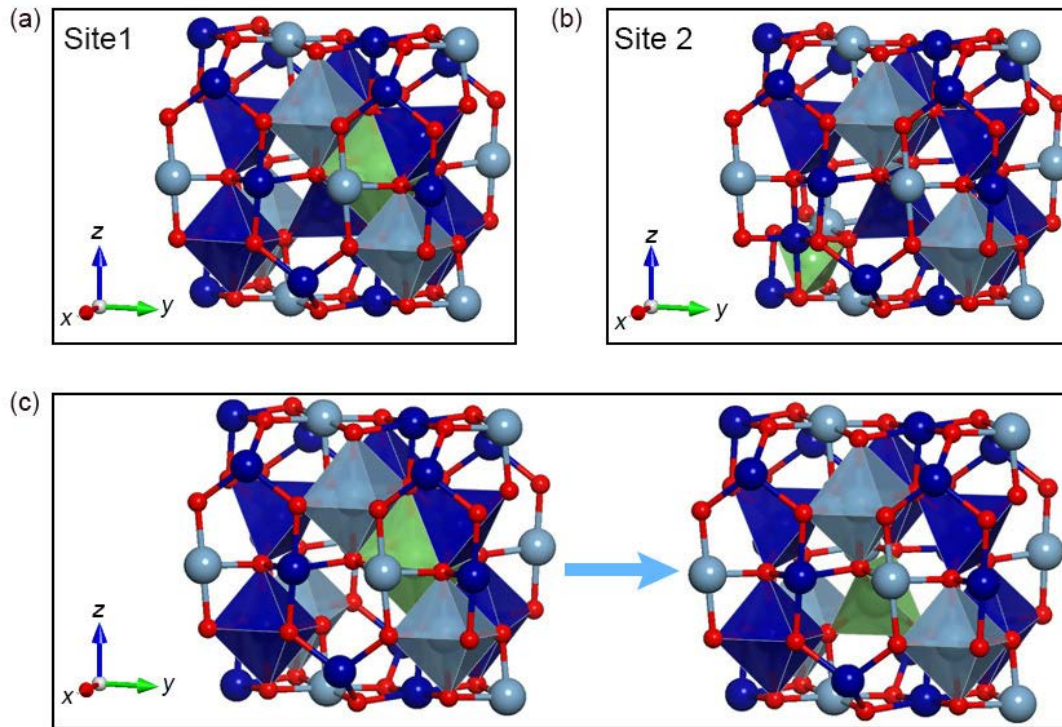

Fig. S5. Li distribution site. (a) site 1 for Li atom distribution without Co vacancy. (b) site 2 for Li atom distribution without Co vacancy. (c) Li at site 1 will spontaneously migrate to the vacancy site once Co vacancy forms.

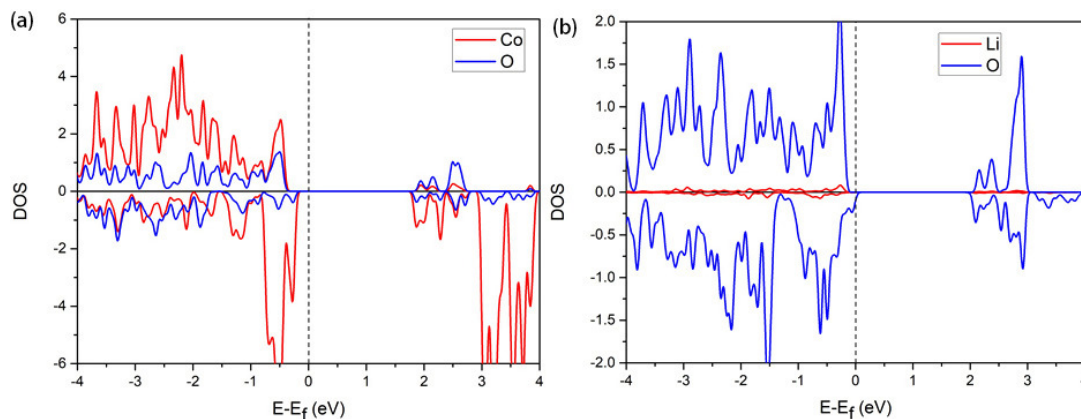

Fig. S6. Density of state (DOS) of Co, Li and O atoms. (a) DOS of Co and O atom in  $\text{Co}_2\text{AlO}_4$  without vacancy. (b) DOS of Li and O atom in  $\text{Co}_2\text{AlO}_4$  with Co at the tetrahedral site being replaced by Li. From DOS, it can be seen that the bonds between Co and O are stronger than those between Li and O. It means that once Co at the tetrahedral site is located by Li atoms, Li atom is much easy displacement during Li migration process between tetrahedral interstice, explaining the energy barrier decrease.

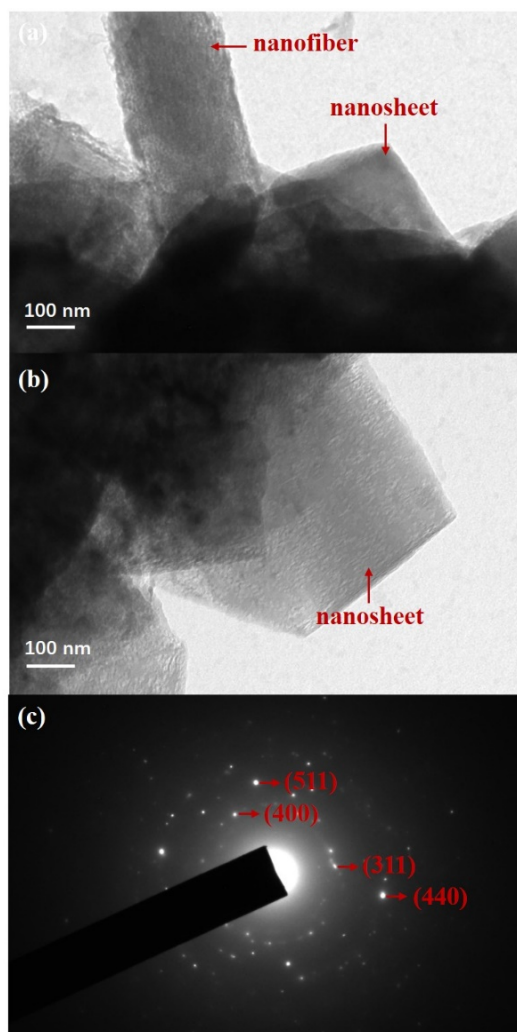

Fig. S7. (a) and (b) are TEM images at different region, and (c) is SAED pattern of  $\text{Co}_2\text{AlO}_4/\text{C}$  NFs @  $\text{Co}_2\text{AlO}_4$  NS at a current density of  $500 \text{ mA g}^{-1}$  after 500 cycles.

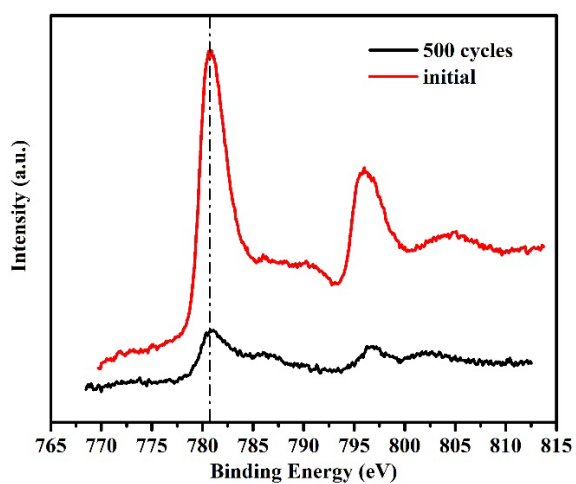

Fig. S8. High-resolution XPS spectra of the Co 2p of  $\text{Co}_2\text{AlO}_4/\text{C}$  NFs @  $\text{Co}_2\text{AlO}_4$  NS in initial state and after 500cycles.

Table S1

Summary of the electrochemical performance of various anode materials with similar morphologies.

| Active substance                                                                                  | Cyclic stability                                                                                                                         | Refs      |
|---------------------------------------------------------------------------------------------------|------------------------------------------------------------------------------------------------------------------------------------------|-----------|
| MoS <sub>2</sub> nanoplates embedded in Carbon nanofibers                                         | after 100 cycles, 1007 mAhg <sup>-1</sup> at 100mA g <sup>-1</sup>                                                                       | 3         |
| SnO <sub>2</sub> nanoflowers on N-doped carbon nanofibers                                         | after 100 cycles, 750 mAhg <sup>-1</sup> at 100mA g <sup>-1</sup>                                                                        | 4         |
| carbonaceous backbones supported MoSe <sub>2</sub> nanosheets                                     | after 100 cycles, 610.8 mAhg <sup>-1</sup> at 100mA g <sup>-1</sup>                                                                      | 5         |
| Porous carbon nanofiber @MoS <sub>2</sub> core/sheath fiber                                       | after 50 cycles, 736 mAhg <sup>-1</sup> at 50mA g <sup>-1</sup>                                                                          | 6         |
| N-doped carbon encapsulated FeS nanosheets with amorphous TiO <sub>2</sub>                        | after 500 cycles, 402.5 mAhg <sup>-1</sup> at 1000mA g <sup>-1</sup>                                                                     | 7         |
| Co <sub>2</sub> AlO <sub>4</sub> /carbon nanofibers @ Co <sub>2</sub> AlO <sub>4</sub> nanosheets | after 100 cycles, 810 mAhg <sup>-1</sup> at 100mA g <sup>-1</sup><br>after 400 cycles, 688.5 mAhg <sup>-1</sup> at 500mA g <sup>-1</sup> | This work |

## References:

- 1 Sara Abouali, Mohammad Akbari Garakani, Biao Zhang, Zheng-Long Xu, Elham Kamali Heidari, Jian-qiu Huang, Jiaqiang Huang, and Jang-Kyo Kim. *ACS Appl. Mater. Interfaces*, 2015, **7**, 13503–13511.
- 2 Qinxing Xie, Yufeng Zhang, Yating Zhu, Weigui Fu, Xu Zhang, Peng Zhao, Shihua Wu, *Electrochimica Acta*, 2017, **247**, 125–131
- 3 C. Zhu, X. Mu, P. A. van Aken, Y. Yu and J. Maier, *Angew. Chem. Int. Ed. Engl.*, 2014, **53**, 2152–6.
- 4 J. Liang, C. Yuan, H. Li, K. Fan, Z. Wei, H. Sun and J. Ma, *Nanomicro. Lett.*, 2018, **10**, 21.
- 5 M. Zhu, Z. Luo, A. Pan, H. Yang, T. Zhu, S. Liang and G. Cao, *Chem. Eng. J.*, 2018, **334**, 2190–2200.
- 6 Y. E. Miao, Y. Huang, L. Zhang, W. Fan, F. Lai and T. Liu, *Nanoscale*, 2015, **7**, 11093–101.
- 7 X. Xie, Y. Hu, G. Fang, X. Cao, B. Yin, Y. Wang, S. Liang, G. Cao and A. Pan, *J. Mater. Chem. A*, 2019, **7**, 16541–16552.
